# Supplementary material
Source: publisher figshare collection journal article supplement (https://tandf.figshare.com/ndownloader/files/13610690)
Supplement: Supplementary file 1 [file 13610690]

**Supplementary tables:**

**Supplementary Table 1 Serum ferritin by disease and by c**ountry

| **Country** | **Overall** | **Argentina** | **Brazil** | **Colombia** | **Mexico** | **Venezuela** |
| --- | --- | --- | --- | --- | --- | --- |
| SF (µg/dL), Median | | | | | | |
| Overall | 1401  (N = 174)  (20.2-12095.0) | 800  (N = 48)  (44.0-12095.0) | 2075  (N = 80)  (24.4-9646.0) | 1153  (N = 21)  (148.0-10700.0) | 496  (N = 8)  (20.2-655.7) | 1199  (N = 17)  (60.6-7071.0) |
| Sickle cell disease | 1897  (N = 91) | 2139  (N = 4) | 2427  (N = 57) | 1172  (N = 20) | - | 1168  (N = 10) |
| Myelodysplastic syndrome | 1458  (N = 15) | 1920  (N = 7) | 1458  (N = 5) | - | 269  (N = 2) | 362  (N = 1) |
| Aplastic anemia | 1076  (N = 31) | 1410  (N = 13) | 2295  (N = 6) | - | 496  (N = 6) | 1277  (N = 6) |
| Pure red cell aplasia | 1036  (N = 2) | - | 1782  (N = 1) | 290  (N = 1) | - | - |
| Diamond-Blackfan anemia | 665  (N = 7) | 665  (N = 7) | - | - | - | - |
| Other transfusion-dependent disorder | 513  (N = 28) | 424  (N = 17) | 1182  (N = 11) | - | - | - |

**Supplementary Table 2 LIC R2 MRI by disease and by country**

| **Country** | | **Overall** | **Argentina** | **Brazil** | **Colombia** | **Mexico** | **Venezuela** |
| --- | --- | --- | --- | --- | --- | --- | --- |
| LIC R2 MRI (mg Fe/g dw), mean ± SD | | | | | | | |
| Overall | | 14.0 ± 14.0  (N = 174)  (0.5-52.5) | 13.3 ± 15.0  (N = 48)  (0.6-52.5) | 16.5 ± 13.2  (N = 79)  (0.6-43.0) | 5.3 ± 9.4  (N = 21)  (0.5-43.0) | 22.4 ± 15.7  (N = 8)  (0.8-43.0) | 11.4 ± 13.7  (N = 18)  (0.9-46.9) |
| Sickle cell disease | | 14.3 ± 13.8  (N = 91) | 14.3 ± 16.1  (N = 4) | 17.3 ± 13.6  (N = 57) | 5.5 ± 9.6  (N = 20) | - | 14.9 ± 15.9  (N = 10) |
| Myelodysplastic syndrome | | 19.0 ± 14.4  (N = 15) | 22.0 ± 14.6  (N = 7) | 20.7 ± 14.7  (N = 5) | - | 13.3 ± 17.6  (N = 2) | 1.4 ± 0.0  (N = 1) |
| Aplastic anemia | | 16.5 ± 15.8  (N = 30) | 18.2 ± 18.5  (N = 13) | 10.6 ± 8.9  (N = 5) | - | 25.5 ± 15.4  (N = 6) | 8.9 ± 10.7  (N = 6) |
| Pure red cell aplasia | 10.8 ± 12.2  (N = 2) | | - | 19.4 ± 0.0  (N = 1) | 2.1 ± 0.0  (N = 1) | - | - |
| Diamond-Blackfan anemia | 5.6 ± 4.8  (N = 7) | | 5.6 ± 4.8  (N = 7) | - | - | - | - |
| Other transfusion-dependent disorder | 10.2 ± 12.8  (N = 29) | | 8.8 ± 13.0  (N = 17) | 13.2 ± 12.9  (N = 11) | - | - | 0.9 ± 0.0  (N = 1) |

LIC, liver iron concentration; MRI, magnetic resonance imging; SD, standard deviation

**Supplementary Table 3 Cardiac T2* by disease and by c**ountry

| **Country** | **Overall** | **Argentina** | **Brazil** | **Colombia** | **Mexico** | | **Venezuela** |
| --- | --- | --- | --- | --- | --- | --- | --- |
| Cardiac T2* MRI (ms), Mean ± SD | | | | | | | |
| Overall | 27.3 ± 10.7  (N = 73)  (6.5-73.5) | 26.6 ± 7.8  (N = 45)  (6.5-44.1) | 28.4 ± 15.1  (N = 19)  (7.2-73.5) | 12.4 ± 0.0  (N = 1)  (12.4-12.4) | 0.0 ± 0.0 | 30.5 ± 12.1  (N = 8)  (10.0-51.3) | |
| Sickle cell disease | 18.4 ± 9.8  (N = 3) | 29.7 ± 0.0  (N = 1) | 13.1 ± 0.0  (N = 1) | 12.4 ± 0.0  (N = 1) | - | - | |
| Myelodysplastic syndrome | 25.3 ± 18.9  (N = 12) | 20.6 ± 11.0  (N = 7) | 33.9 ± 30.3  (N = 4) | - | - | 23.0 ± 0.0  (N = 1) | |
| Aplastic anemia | 27.8 ± 10.3  (N = 24) | 27.9 ± 9.0  (N = 13) | 23.0 ± 9.0  (N = 5) | - | - | 31.4 ± 13.9  (N = 6) | |
| Pure red cell aplasia | - | - | - | - | - | - | |
| Diamond-Blackfan anemia | 29.1 ± 6.5  (N = 7) | 29.1 ± 6.5  (N = 7) | - | - | - | - | |
| Other transfusion-dependent disorder | 28.4 ± 6.2  (N = 27) | 26.9 ± 5.0  (N = 17) | 30.6 ± 7.9  (N = 9) | - |  | 32.5 ± 0.0  (N = 1) | |

**Supplementary Table 4 Effect of chelation on serum ferritin and liver iron concentration (LIC)**

| **Disease** | **Serum ferritin, ng/mL**  **median (range)** | | **LIC, mg Fe/g dw**  **mean (SD)** | |
| --- | --- | --- | --- | --- |
| **With chelation** | **Without chelation** | **With chelation** | **Without chelation** |
| Sickle cell disease (homozygous) | 2685 (245-9646)  n = 46 | 1392 (60.6-10700)  n = 45 | 18.4 ± 14.8  n = 46 | 10.1 ± 11.5  n = 45 |
| Myelodysplastic syndrome | 1750 (250.3-8083)  n = 11 | 440 (20.2-4049)  n = 4 | 22.4 ± 14.2  n = 11 | 9.7 ± 11.6  n = 4 |
| Aplastic anemia | 784 (24.4-12095)  n = 16 | 1410 (44-3897)  n = 15 | 21.2 ± 19.6  n = 15 | 11.8 ± 9.3  n = 15 |
| Pure red cell aplasia | 290 (290-290)  n = 1 | 1782 (1782-1782)  n = 1 | 2.1  n = 1 | 19.4  n = 1 |
| Diamond-Blackfan anemia | 794 (337-2889.3)  n = 5 | 468 (395-540)  n = 2 | 4.6 ± 3.7  n = 5 | 8 ± 8.1  n = 2 |
| Other transfusion-dependent disorder | 568 (69.9-6430)  n = 18 | 103 (102.7-534.6)  n = 3 | 12.2 ± 13.9  n = 18 | 6.9 ± 10.5  n = 11 |

**Supplementary Table 5 Correlation between liver and cardiac iron overload and serum ferritin**

|  | **Relationship between liver iron overload and SF** | | | | | |
| --- | --- | --- | --- | --- | --- | --- |
| **Country** | Overall | Argentina | Brazil | Colombia | Mexico | Venezuela |
| No. of patients | 173 | 48 | 79 | 21 | 8 | 17 |
| Relationship between liver iron overload (yes/no) and SF/1000; OR (95% CI) | 1.76  (1.25, 2.47) | 9.08  (1.34, 61.65 | 10.90  (2.37, 50.37) | 1.03  (0.79, 1.36) | NA | 1.66  (0.67. 4.10) |
| Relationship between R2 MRI and SF; OR (95% CI) | 0.48  (0.35, 0.58) | 0.68  (0.49, 0.81) | 0.60  (0.44, 0.73) | -0.03  (-0.46, 0.41) | 0.39  (-0.43, 0.86) | 0.60  (0.17, 4.10) |
| Relationship between liver IOL (yes/no) and SF (≤1500 or >1500);  OR (95% CI) | 7.33  (2.88, 18.63) | 9.00  (1.05, 77.03) | 19.16  (2.21, 166.15) | 1.78  (0.28, 166.15) | NA | 4.00  (0.34, 47.11) |
|  | **Relationship between cardiac iron overload and SF** | | | | | |
| No. of patients | 72 | 45 | 19 | 1 | 0 | 7 |
| Relationship between cardiac iron overload (yes/no) and SF/1000; OR (95% CI) | 1.40  (1.04, 1.90) | 1.50  (1.05, 2.15) | 19  (0.54, 2.47) | NA | NA | 1.04  (0.08, 14.37) |
| Relationship between T2* MRI and SF, OR (95% CI) | -0.17  (-0.39, 0.07) | -0.37  (-0.60, -0.09) | 0.13  (-0.34, 0.55) | NA | NA | -0.12  (-0.80, 0.70) |
